# Supplementary material
Source: publisher figshare collection journal article supplement (https://karger.figshare.com/ndownloader/files/35903813)
Supplement: Supplementary file 1 [file 35903813]

**Supplementary (originally in Excell)**

1. **Phenotype genotype summary**

| **Phenotype** | **Zygosity** | **Allele 1** | **Allele 2** | **Reference** |
| --- | --- | --- | --- | --- |
| ACG-1B | HMZ | p.[L483P] | p.[L483P] | Rossi et al., 1996a |
| ACG-1B | cHTZ | p.[R178*] | p.[G678V] | Superti-Furga et al., 1996a |
| ACG-1B | cHTZ | p.[N425D] | p.[K575Sfs*10] | Superti-Furga et al., 1996a |
| ACG-1B | cHTZ | p.[R178*] | p.[S399Hfs*61] | Superti-Furga et al., 1996a |
| ACG-1B | cHTZ | p.[R178*] | p.[Y151Ifs*21] | Superti-Furga et al.,1996a |
| ACG-1B | HMZ | p.[V340del] | p.[V340del] | Superti-Furga et al., 1996a; Cai et al., 1998 |
| ACG-1B | HMZ | p.[L132P] | p.[L132P] | Unger et al., 2001 |
| ACG-1B | HMZ | p.[G663R] | p.[G663R] | Sato et al., 2020 |
| ACG-1B | HTZ | p.[V340del] | unknown | **Present cohort (P1)** |
| ACG-1B | cHTZ | c.[−26+2T>C] | p.[G259V] | Unger et al., 2001 (described as severe AO-2/ACG-1B) |
| ACG-1B | cHTZ | c.[−26+2T>C] | p.[N425D] | Unger et al., 2001 (described as severe AO-2/ACG-1B) |
| AO-2 | cHTZ | p.[G255E] | p.[A715V] | Hästbacka et al., 1996 |
| AO-2 | cHTZ | p.[R279W] | p.[L131Cfs*41] | Rossi et al., 1996b |
| AO-2 | HMZ | p.[L599F] | p.[L599F] | Miller et al., 2008; Vikraman et al., 2016 |
| AO-2 | cHTZ | c.[−26+2T>C] | p.[R49Dfs*40] | Dwyer et al., 2010 |
| AO-2 | cHTZ | p.[R279W] | p.[T627Lfs*23] | **Present cohort (P2)** |
| AO-2 | HMZ | p.[T512K] | p.[T512K] | Bonafé et al., 2008 |
| AO-2, DTD | cHTZ | p.[R279W] | p.[N425D] | Rossi et al., 1997; Barbosa et al., 2011 |
| AO-2, DTD | cHTZ | p.[R279W] | p.[K575Sfs*10] | Hästbacka et al., 1996; **Present cohort (P5 and P6)** |
| AO-2, DTD | cHTZ | p.[R279W] | p.[R178*] | Macías-Gómez et al.,2004 (described as excessively severe for DD and very mild for AO-2); Barbosa et al., 2011; Mattos et al., 2014 (described as AO-2 and severe DTD); Present cohort (P3 AO-2, P8 DD and P9 DD) |
| AO-2, DTD | HTZ | p.[R279W] | unknown | Rossi et al., 1996b (described as intermediate **AO-2** and DD) |
| DTD | HMZ | p.[Q454P] | p.[Q454P] | Mégarbane et al., 1999 (described as mild AO-2 and severe DD) |
| DTD | cHTZ | p.[R279W] | p.[G663R] | Maeda et al., 2006 (described as intermediate between AO-2 and DD) |
| DTD | HTZ | c.[727-1G>C] | unknown | Hästbacka et al., 1994 |
| DTD | HTZ | p.[A662Qfs*6] | unknown | Hästbacka et al., 1994 |
| DTD | cHTZ | p.[R279W] | p.[V340del] | Hästbacka et al., 1999 |
| DTD | HTZ | c.[−26+2T>C] | unknown | Hästbacka et al., 1999; Remes et al., 2002 |
| DTD | HMZ | c.[−26+2T>C] | c.[−26+2T>C] | Hästbacka et al., 1999; Remes et al., 2002; Makitie et al., 2015 |
| DTD | cHTZ | p.[C653S] | p.[L707Pfs*4] | Ramírez-Castro et al., 2005 |
| DTD | cHTZ | c.[−26+2T>C] | p.[T512K] | Bonafé et al., 2008 |
| DTD | cHTZ | p.[C653S] | p.[A715V] | Czarny-Ratajczak et al., 2010; Jackson et al., 2011 |
| DTD | cHTZ | p.[R279W] | c.[727-1G>C] | Barbosa et al., 2011 |
| DTD | cHTZ | p.[R279W] | p.[L707Pfs*4] | Honório et al., 2013 |
| DTD | cHTZ | p.[R279W] | p.[S157T] | Pineda et al., 2013 |
| DTD | cHTZ | p.[R279W] | c.[727-1G>C] | **Present cohort (P4)** |
| DTD | cHTZ | p.[R279W] | p.[G115A] | **Present cohort (P7)** |
| DTD, AO-2 | HTZ | p.[K575Sfs*10] | unknown | Hästbacka et al., 1994; Hästbacka et al., 1996 |
| DTD, rMED | cHTZ | p.[R279W] | c.[−26+2T>C] | Remes et al., 2002; Ballhausen et al., 2003; Dwyer et al., 2010; Zechi-Ceide et al., 2013; Makitie et al., 2015 |
| rMED | cHTZ | p.[R279W] | p.[G237V] | Ballhausen et al., 2003 |
| rMED | cHTZ | p.[R279W] | p.[N77H] | Ballhausen et al., 2003 |
| rMED | cHTZ | c.[−26+2T>C] | p.[C653S] | Ballhausen et al., 2003; Jackson et al., 2011; Kausar et al., 2018 |
| rMED | HMZ | p.[C653S] | p.[C653S] | Ballhausen et al., 2003; Matikie et al., 2003; Hinrichs et al., 2010 |
| rMED | cHTZ | p.[D385N] | p.[V162Gfs*12] | Cho et al., 2010; Kim et al., 2011 |
| rMED | cHTZ | c.[−26+2T>C] | p.[F256S] | Jackson et al., 2011 |
| rMED | cHTZ | p.[R279W] | p.[T512K] | Syvänen et al., 2013; Mäkitie et al., 2015; Kausar et al., 2018 |
| rMED | cHTZ | p.[R279W] | p.[S522F] | Barreda-Bonis et al., 2017 |
| rMED | cHTZ | p.[L275P] | p.[L400F] | Zhou et al., 2018 |
| rMED | HMZ | p.[R279W] | p.[R279W] | Superti-Furga et al., 1999; Czarny-Ratajczak, et al., 2001; Huber et al., 2001; Ballhausen et al., 2003; Jakkula et al., 2005; Barbosa et al., 2011; Jackson et al., 2011; Martínez-Garcia et al., 2014; Barreda-Bonis et al., 2017; **Present cohort (P10 and P11)** |
| Intermediate phenotype |  |  |  |  |
| DTD/DBQD | cHTZ | p.[A133V] | p.[R178*] | Panzer et al., 2008 |
| DTD/rMED/DBQD | cHTZ | p.[T266I] | p.[V340del] | Miyake et al., 2008 |
| rMED/DBQD | cHTZ | p.[R279W] | p.[A719Qfs*16] | **Present cohort (P12)** |

1. **List of patients by references**

| **Reference** | **Origin** | **Family number** | **Patient** | **Consanguinity** | **Phenotype described** | **Zygosity** | **Allele 1** | **Allele 2** |
| --- | --- | --- | --- | --- | --- | --- | --- | --- |
| Hästbacka et al., 1994 | United States of America | 1 | 1 | NS | DTD | HTZ | c.[727-1G>C] | unknown |
| Hästbacka et al., 1994 | Canada | 2 | 2 | NS | DTD | HTZ | p.[A662Qfs*6] | unknown |
| Hästbacka et al., 1994 | France | 3 | 3 | N | DTD | HTZ | p.[K575Sfs*10] | unknown |
| Hästbacka et al., 1994 | Germany | 4 | 4 | N | DTD | HTZ | p.[K575Sfs*10] | unknown |
| Hästbacka et al., 1994 | Netherlands | 5 | 5 | N | DTD | HTZ | p.[K575Sfs*10] | unknown |
| Superti-Furga et al., 1996a | NS | 13 | 13 | N | ACG-1B | cHTZ | p.[R178*] | p.[G678V] |
| Superti-Furga et al., 1996a | NS | 14 | 14 | NS | ACG-1B | cHTZ | p.[R178*] | p.[S399Hfs*61] |
| Superti-Furga et al., 1996a | Netherlands | 15 | 15 | N | ACG-1B | cHTZ | p.[N425D] | p.[K575Sfs*10] |
| Superti-Furga et al., 1996a | NS | 16 | 16 | N | ACG-1B | HMZ | p.[V340del] | p.[V340del] |
| Superti-Furga et al., 1996a | NS | 17 | 17 | NS | ACG-1B | cHTZ | p.[R178*] | p.[Y151Ifs*21] |
| Superti-Furga et al., 1996a | Turkey | 18 | 18 | **S** | ACG-1B | HMZ | p.[V340del] | p.[V340del] |
| Hästbacka et al., 1996 | NS | 6 | 6 | NS | AO-2 | cHTZ | p.[G255E] | p.[A715V] |
| Hästbacka et al., 1996 | NS | 7 | 7 | NS | AO-2 | HTZ | p.[K575Sfs*10] | unknown |
| Hästbacka et al., 1996 | NS | 8 | 8 | NS | AO-2 | cHTZ | p.[R279W] | p.[K575Sfs*10] |
| Rossi et al., 1996a | NS | 9 | 9 | **S** | ACG-1B | HMZ | p.[L483P] | p.[L483P] |
| Rossi et al., 1996b | Netherlands | 10 | 10 | NS | AO-2 | cHTZ | p.[R279W] | p.[L131Cfs*41] |
| Rossi et al., 1996b | Netherlands | 11 | 11 | NS | AO-2 | HTZ | p.[R279W] | unknown |
| Rossi et al., 1996b | Netherlands | 12 | 12 | N | DTD | HTZ | p.[R279W] | unknown |
| Rossi et al., 1997 | NS | 19 | 19 | N | AO-2 | cHTZ | p.[R279W] | p.[N425D] |
| Cai et al., 1998 | Japan | 20 | 20 | N | ACG-1B | HMZ | p.[V340del] | p.[V340del] |
| Mégarbané et al., 1999 | Lebanon | 21 | 21 | **S** | DTD | HMZ | p.[Q454P] | p.[Q454P] |
| Superti-Furga et al., 1999 | German | 22 | 22 | N | rMED | HMZ | p.[R279W] | p.[R279W] |
| Czarny-Ratajczak, et al., 2001 | NS | 23 | 23 | NS | rMED | HMZ | p.[R279W] | p.[R279W] |
| Czarny-Ratajczak, et al., 2001 | NS | 24 | 24 | NS | rMED | HMZ | p.[R279W] | p.[R279W] |
| Huber et al., 2001 | France | 25 | 25 | NS | rMED | HMZ | p.[R279W] | p.[R279W] |
| Huber et al., 2001 | NS |  | 26 | NS | rMED | HMZ | p.[R279W] | p.[R279W] |
| Huber et al., 2001 | NS | 26 | 27 | NS | rMED | HMZ | p.[R279W] | p.[R279W] |
| Huber et al., 2001 | NS |  | 28 | NS | rMED | HMZ | p.[R279W] | p.[R279W] |
| Unger et al., 2001 | NS | 27 | 29 | NS | ACG-1B | cHTZ | c.[−26+2T>C] | p.[N425D] |
| Unger et al., 2001 | NS | 28 | 30 | NS | ACG-1B | cHTZ | c.[−26+2T>C] | p.[G259V] |
| Unger et al., 2001 | Somali | 29 | 31 | NS | ACG-1B | HMZ | p.[L132P] | p.[L132P] |
| Ballhausen et al., 2003 | NS | 30 | 32 | NS | rMED | cHTZ | c.[−26+2T>C] | p.[C653S] |
| Balhausen et al., 2003 | NS | 31 | 33 | NS | rMED | cHTZ | p.[R279W] | c.[−26+2T>C] |
| Balhausen et al., 2003 | NS | 32 | 34 | NS | rMED | HMZ | p.[C653S] | p.[C653S] |
| Balhausen et al., 2003 | NS | 33 | 35 | NS | rMED | HMZ | p.[C653S] | p.[C653S] |
| Balhausen et al., 2003 | NS | 34 | 36 | NS | rMED | HMZ | p.[C653S] | p.[C653S] |
| Balhausen et al., 2003 | NS | 35 | 37 | NS | rMED | cHTZ | p.[R279W] | p.[G237V] |
| Balhausen et al., 2003 | NS | 36 | 38 | NS | rMED | cHTZ | p.[R279W] | p.[N77H] |
| Balhausen et al., 2003 | NS | 48(12fam) | 39 | NS | rMED | HMZ | p.[R279W] | p.[R279W] |
| Balhausen et al., 2003 | NS |  | 40 | NS | rMED | HMZ | p.[R279W] | p.[R279W] |
| Balhausen et al., 2003 | NS |  | 41 | NS | rMED | HMZ | p.[R279W] | p.[R279W] |
| Balhausen et al., 2003 | NS |  | 42 | NS | rMED | HMZ | p.[R279W] | p.[R279W] |
| Balhausen et al., 2003 | NS |  | 43 | NS | rMED | HMZ | p.[R279W] | p.[R279W] |
| Balhausen et al., 2003 | NS |  | 44 | NS | rMED | HMZ | p.[R279W] | p.[R279W] |
| Balhausen et al., 2003 | NS |  | 45 | NS | rMED | HMZ | p.[R279W] | p.[R279W] |
| Balhausen et al., 2003 | NS |  | 46 | NS | rMED | HMZ | p.[R279W] | p.[R279W] |
| Balhausen et al., 2003 | NS |  | 47 | NS | rMED | HMZ | p.[R279W] | p.[R279W] |
| Balhausen et al., 2003 | NS |  | 48 | NS | rMED | HMZ | p.[R279W] | p.[R279W] |
| Balhausen et al., 2003 | NS |  | 49 | NS | rMED | HMZ | p.[R279W] | p.[R279W] |
| Balhausen et al., 2003 | NS |  | 50 | NS | rMED | HMZ | p.[R279W] | p.[R279W] |
| Balhausen et al., 2003 | NS |  | 51 | NS | rMED | HMZ | p.[R279W] | p.[R279W] |
| Balhausen et al., 2003 | NS |  | 52 | NS | rMED | HMZ | p.[R279W] | p.[R279W] |
| Balhausen et al., 2003 | NS |  | 53 | NS | rMED | HMZ | p.[R279W] | p.[R279W] |
| Balhausen et al., 2003 | NS |  | 54 | NS | rMED | HMZ | p.[R279W] | p.[R279W] |
| Balhausen et al., 2003 | NS |  | 55 | NS | rMED | HMZ | p.[R279W] | p.[R279W] |
| Balhausen et al., 2003 | NS |  | 56 | NS | rMED | HMZ | p.[R279W] | p.[R279W] |
| Matikie et al., 2003 | Hungary | 49 | 57 | N | rMED | HMZ | p.[C653S] | p.[C653S] |
| Matikie et al., 2003 | Hungary |  | 58 | N | rMED | HMZ | p.[C653S] | p.[C653S] |
| Matikie et al., 2003 | Russia | 50 | 59 | N | rMED | HMZ | p.[C653S] | p.[C653S] |
| Macías-Gómez et al., 2004 | Mexico | 51 | 60 | N | DTD | cHTZ | p.[R279W] | p.[R178*] |
| Jakkula et al., 2005 | NS | 52 | 61 | NS | rMED | HMZ | p.[R279W] | p.[R279W] |
| Ramírez-Castro et al., 2005 | NS | 53 | 62 | N | DTD | cHTZ | p.[C653S] | p.[L707Pfs*4] |
| Maeda et al., 2006 | Japan | 54 | 63 | N | DTD | cHTZ | p.[R279W] | p.[G663R] |
| Miller et al., 2008 | Bangladesh | 55 | 64 | S | AO-2 | HMZ | p.[L599F] | p.[L599F] |
| Miyake et al., 2008 | Japan | 56 | 65 | N | DTD/rMED/DBQD | cHTZ | p.[T266I] | p.[V340del] |
| Panzer et al., 2008 | NS | 57 | 66 | N | DTD/DBQD | cHTZ | p.[A133V] | p.[R178*] |
| Bonafé et al., 2008 | Finland | 58 | 67 | S | AO-2 | HMZ | p.[T512K] | p.[T512K] |
| Bonafé et al., 2008 | Finland |  | 68 | S | AO-2 | HMZ | p.[T512K] | p.[T512K] |
| Cho et al., 2010 | Korea | 59 | 69 | N | rMED | cHTZ | p.[D385N] | p.[V162Gfs*12] |
| Czarny-Ratajczak et al., 2010 | Poland | 60 | 70 | N | DTD | cHTZ | p.[C653S] | p.[A715V] |
| Czarny-Ratajczak et al., 2010 | Poland |  | 71 | N | DTD | cHTZ | p.[C653S] | p.[A715V] |
| Czarny-Ratajczak et al., 2010 | Poland |  | 72 | N | DTD | cHTZ | p.[C653S] | p.[A715V] |
| Dwyer et al., 2010 | NS | 61 | 73 | N | DTD | cHTZ | p.[R279W] | c.[−26+2T>C] |
| Dwyer et al., 2010 | NS |  | 74 | N | DTD | cHTZ | p.[R279W] | c.[−26+2T>C] |
| Dwyer et al., 2010 | NS |  | 75 | N | AO-2 | cHTZ | p.[R49Dfs*40] | c.[−26+2T>C] |
| Hinrichs et al., 2010 | NS | 62 | 76 | NS | rMED | HMZ | p.[C653S] | p.[C653S] |
| Barbosa et al., 2011 | Portugal | 63 | 77 | N | DTD | cHTZ | p.[R279W] | p.[R178*] |
| Barbosa et al., 2011 | Portugal | 64 | 78 | N | DTD | cHTZ | p.[R279W] | p.[R178*] |
| Barbosa et al., 2011 | Portugal | 65 | 79 | N | DTD | cHTZ | p.[R279W] | p.[R178*] |
| Barbosa et al., 2011 | Portugal | 66 | 80 | N | DTD | cHTZ | p.[R279W] | p.[R178*] |
| Barbosa et al., 2011 | Portugal | 67 | 81 | N | DTD | cHTZ | p.[R279W] | p.[R178*] |
| Barbosa et al., 2011 | Portugal |  | 82 | N | DTD | cHTZ | p.[R279W] | p.[R178*] |
| Barbosa et al., 2011 | Portugal | 68 | 83 | N | DTD | cHTZ | p.[R279W] | p.[N425D] |
| Barbosa et al., 2011 | Portugal | 69 | 84 | N | DTD | cHTZ | p.[R279W] | p.[R178*] |
| Barbosa et al., 2011 | Portugal | 70 | 85 | N | DTD | cHTZ | p.[R279W] | c.[727-1G>C] |
| Barbosa et al., 2011 | Portugal | 71 | 86 | N | DTD | cHTZ | p.[R279W] | c.[727-1G>C] |
| Barbosa et al., 2011 | Portugal | 72 | 87 | N | rMED | HMZ | p.[R279W] | p.[R279W] |
| Barbosa et al., 2011 | Portugal | 73 | 88 | N | rMED | HMZ | p.[R279W] | p.[R279W] |
| Barbosa et al., 2011 | Portugal | 74 | 89 | N | rMED | HMZ | p.[R279W] | p.[R279W] |
| Barbosa et al., 2011 | Portugal |  | 90 | N | rMED | HMZ | p.[R279W] | p.[R279W] |
| Jackson et al., 2011 | NS | 75 | 91 | NS | rMED | cHTZ | p.[F256S] | c.[−26+2T>C] |
| Jackson et al., 2011 | NS | 76 | 92 | NS | rMED | cHTZ | p.[C653S] | c.[−26+2T>C] |
| Jackson et al., 2011 | NS | 77 | 93 | NS | rMED | cHTZ | p.[R279W] | c.[−26+2T>C] |
| Jackson et al., 2011 | NS | 78 | 94 | NS | rMED | cHTZ | p.[C653S] | p.[A715V] |
| Jackson et al., 2011 | NS | 79 | 95 | NS | rMED | HMZ | p.[R279W] | p.[R279W] |
| Jackson et al., 2011 | NS | 80 | 96 | NS | rMED | HMZ | p.[R279W] | p.[R279W] |
| Jackson et al., 2011 | NS | 81 | 97 | NS | rMED | HMZ | p.[R279W] | p.[R279W] |
| Jackson et al., 2011 | NS | 82 | 98 | NS | rMED | HMZ | p.[R279W] | p.[R279W] |
| Jackson et al., 2011 | NS | 83 | 99 | NS | rMED | HMZ | p.[R279W] | p.[R279W] |
| Jackson et al., 2011 | NS | 84 | 100 | NS | rMED | HMZ | p.[R279W] | p.[R279W] |
| Jackson et al., 2011 | NS | 85 | 101 | NS | rMED | HMZ | p.[R279W] | p.[R279W] |
| Jackson et al., 2011 | NS | 86 | 102 | NS | rMED | HMZ | p.[R279W] | p.[R279W] |
| Jackson et al., 2011 | NS | 87 | 103 | NS | rMED | HMZ | p.[R279W] | p.[R279W] |
| Jackson et al., 2011 | NS | 88 | 104 | NS | rMED | HMZ | p.[R279W] | p.[R279W] |
| Jackson et al., 2011 | NS | 89 | 105 | NS | rMED | HMZ | p.[R279W] | p.[R279W] |
| Jackson et al., 2011 | NS | 90 | 106 | NS | rMED | HMZ | p.[R279W] | p.[R279W] |
| Kim et al., 2011 | Korea | 91 | 107 | NS | rMED | cHTZ | p.[V162Gfs*12] | p.[D385N] |
| Honório et al., 2013 | Brazil | 92 | 108 | N | DTD | cHTZ | p.[R279W] | p.[L707Pfs*4] |
| Pineda et al., 2013 | Colombia | 93 | 109 | N | DTD | cHTZ | p.[R279W] | p.[S157T] |
| Zechi-Ceide et al., 2013 | Brazil | 94 | 110 | N | DTD | cHTZ | p.[R279W] | c.[−26+2T>C] |
| Zechi-Ceide et al., 2013 | Brazil |  | 111 | N | DTD | cHTZ | p.[R279W] | c.[−26+2T>C] |
| Syvänen et al., 2013 | Finland | 95 | 112 | N | rMED | cHTZ | p.[R279W] | p.[T512K] |
| Martínez García et al., 2014 | NS | 96 | 113 | NS | rMED | HMZ | p.[R279W] | p.[R279W] |
| Mattos et al., 2014 | Brazil | 97 | 114 | N | AO-2 | cHTZ | p.[R279W] | p.[R178*] |
| Makitie et al., 2015 | Sweden | 98 | 115 | NS | rMED | cHTZ | p.[R279W] | p.[T512K] |
| Makitie et al., 2015 | Finland/Sweden | 99 | 116 | NS | rMED | cHTZ | p.[R279W] | c.[−26+2T>C] |
| Makitie et al., 2015 | Finland/Sweden | 100 | 117 | NS | rMED | cHTZ | p.[R279W] | c.[−26+2T>C] |
| Makitie et al., 2015 | Finland | 101 | 118 | NS | rMED | cHTZ | p.[R279W] | c.[−26+2T>C] |
| Makitie et al., 2015 | Finland |  | 119 | NS | rMED | cHTZ | p.[R279W] | c.[−26+2T>C] |
| Vikraman et al., 2016 | India | 102 | 120 | **S** | AO-2 | HMZ | p.[L599F] | p.[L599F] |
| Barreda-Bonis et al., 2017 | NS | 103 | 121 | NS | rMED | cHTZ | p.[R279W] | p.[S522F] |
| Barreda-Bonis et al., 2017 | NS |  | 122 | N | rMED | HMZ | p.[R279W] | p.[R279W] |
| Kausar et al., 2018 | Finland | 104 | 123 | N | rMED | cHTZ | c.[−26+2T>C] | p.[C653S] |
| Kausar et al., 2018 | Finland | 105 | 124 | N | rMED | cHTZ | p.[R279W] | p.[T512K] |
| Zhou et al., 2018 | China | 106 | 125 | N | rMED | cHTZ | p.[L275P] | p.[L400F] |
| Zhou et al., 2018 | China |  | 126 | N | rMED | cHTZ | p.[L275P] | p.[L400F] |
| Sato et al., 2020 | Japan | 107 | 127 | N | ACG-1B | HMZ | p.[G663R] | p.[G663R] |
| Sato et al., 2020 | Japan |  | 128 | N | ACG-1B | HMZ | p.[G663R] | p.[G663R] |
| Sato et al., 2020 | Japan | 108 | 129 | N | ACG-1B | HMZ | p.[G663R] | p.[G663R] |
| Present cohort | Brazil | 109 | 130 | N | ACG-1B | HTZ | p.[V340del] | unknown |
| Present cohort | Brazil | 110 | 131 | N | AO-2 | cHTZ | p.[R279W] | p.[T627Lfs*23] |
| Present cohort | Brazil | 111 | 132 | N | AO-2 | cHTZ | p.[R279W] | p.[R178*] |
| Present cohort | Brazil | 112 | 133 | N | DTD | cHTZ | p.[R279W] | c.[727-1G>C] |
| Present cohort | Brazil | 113 | 134 | N | DTD | cHTZ | p.[R279W] | p.[K575Sfs*10] |
| Present cohort | Brazil |  | 135 | N | DTD | cHTZ | p.[R279W] | p.[K575Sfs*10] |
| Present cohort | Brazil | 114 | 136 | N | DTD | cHTZ | p.[R279W] | p.[G115A] |
| Present cohort | Argentina | 115 | 137 | N | DTD | cHTZ | p.[R279W] | p.[R178*] |
| Present cohort | Brazil | 116 | 138 | N | DTD | cHTZ | p.[R279W] | p.[R178*] |
| Present cohort | Brazil | 117 | 139 | N | rMED | HMZ | p.[R279W] | p.[R279W] |
| Present cohort | Brazil | 118 | 140 | N | rMED | HMZ | p.[R279W] | p.[R279W] |
| Present cohort | Brazil | 119 | 141 | N | rMED/DBQD | cHTZ | p.[R279W] | p.[A719Qfs*16] |
| Total |  | 119 | 141 |  |  |  |  |  |
|  |  |  |  |  |  |  |  |  |
| Y: yes, N: No, NS: not specified | |  |  |  |  |  |  |  |
|  |  |  |  |  |  |  |  |  |

1. **DTD Finnish**

| **Reference** | **Family number** | **Patient** | **Zygosity** | **Allele 1** | **Allele 2** |
| --- | --- | --- | --- | --- | --- |
| Hästbacka et al., 1999 | 69fam | 122 (102 patients) | HMZ | c.[−26+2T>C] | c.[−26+2T>C] |
| Hästbacka et al., 1999 | 14fam |  | HTZ | c.[−26+2T>C] | unknown |
| Hästbacka et al., 1999 | 1fam |  | cHTZ | p.[R279W] | p.[V340del] |
| Remes et al., 2002 | 85 | 103 | HMZ | c.[−26+2T>C] | c.[−26+2T>C] |
| Remes et al., 2002 |  | 104 | HMZ | c.[−26+2T>C] | c.[−26+2T>C] |
| Remes et al., 2002 |  | 105 | HMZ | c.[−26+2T>C] | c.[−26+2T>C] |
| Remes et al., 2002 | 86 | 106 | HMZ | c.[−26+2T>C] | c.[−26+2T>C] |
| Remes et al., 2002 |  | 107 | HMZ | c.[−26+2T>C] | c.[−26+2T>C] |
| Remes et al., 2002 |  | 108 | HMZ | c.[−26+2T>C] | c.[−26+2T>C] |
| Remes et al., 2002 | 87 | 109 | HMZ | c.[−26+2T>C] | c.[−26+2T>C] |
| Remes et al., 2002 |  | 110 | HMZ | c.[−26+2T>C] | c.[−26+2T>C] |
| Remes et al., 2002 |  | 111 | HMZ | c.[−26+2T>C] | c.[−26+2T>C] |
| Remes et al., 2002 | 88 | 112 | HMZ | c.[−26+2T>C] | c.[−26+2T>C] |
| Remes et al., 2002 |  | 113 | HMZ | c.[−26+2T>C] | c.[−26+2T>C] |
| Remes et al., 2002 | 89 | 114 | HMZ | c.[−26+2T>C] | c.[−26+2T>C] |
| Remes et al., 2002 |  | 115 | HMZ | c.[−26+2T>C] | c.[−26+2T>C] |
| Remes et al., 2002 | 90 | 116 | HMZ | c.[−26+2T>C] | c.[−26+2T>C] |
| Remes et al., 2002 |  | 117 | HMZ | c.[−26+2T>C] | c.[−26+2T>C] |
| Remes et al., 2002 | 91 | 118 | HMZ | c.[−26+2T>C] | c.[−26+2T>C] |
| Remes et al., 2002 |  | 119 | HMZ | c.[−26+2T>C] | c.[−26+2T>C] |
| Remes et al., 2002 | 92 | 120 | HMZ | c.[−26+2T>C] | c.[−26+2T>C] |
| Remes et al., 2002 |  | 121 | HMZ | c.[−26+2T>C] | c.[−26+2T>C] |
| Remes et al., 2002 | 93 | 122 | HMZ | c.[−26+2T>C] | c.[−26+2T>C] |
| Remes et al., 2002 | 94 | 123 | HMZ | c.[−26+2T>C] | c.[−26+2T>C] |
| Remes et al., 2002 | 95 | 124 | HMZ | c.[−26+2T>C] | c.[−26+2T>C] |
| Remes et al., 2002 | 96 | 125 | HMZ | c.[−26+2T>C] | c.[−26+2T>C] |
| Remes et al., 2002 | 97 | 126 | HMZ | c.[−26+2T>C] | c.[−26+2T>C] |
| Remes et al., 2002 | 98 | 127 | HMZ | c.[−26+2T>C] | c.[−26+2T>C] |
| Remes et al., 2002 | 99 | 128 | HMZ | c.[−26+2T>C] | c.[−26+2T>C] |
| Remes et al., 2002 | 100 | 129 | HMZ | c.[−26+2T>C] | c.[−26+2T>C] |
| Remes et al., 2002 | 101 | 130 | HMZ | c.[−26+2T>C] | c.[−26+2T>C] |
| Remes et al., 2002 | 102 | 131 | HMZ | c.[−26+2T>C] | c.[−26+2T>C] |
| Remes et al., 2002 | 103 | 132 | HMZ | c.[−26+2T>C] | c.[−26+2T>C] |
| Remes et al., 2002 | 104 | 133 | HMZ | c.[−26+2T>C] | c.[−26+2T>C] |
| Remes et al., 2002 | 105 | 134 | HMZ | c.[−26+2T>C] | c.[−26+2T>C] |
| Remes et al., 2002 | 106 | 135 | HMZ | c.[−26+2T>C] | c.[−26+2T>C] |
| Remes et al., 2002 | 107 | 136 | HMZ | c.[−26+2T>C] | c.[−26+2T>C] |
| Remes et al., 2002 | 108 | 137 | HMZ | c.[−26+2T>C] | c.[−26+2T>C] |
| Remes et al., 2002 | 109 | 138 | HMZ | c.[−26+2T>C] | c.[−26+2T>C] |
| Remes et al., 2002 | 110 | 139 | HMZ | c.[−26+2T>C] | c.[−26+2T>C] |
| Remes et al., 2002 | 111 | 140 | HMZ | c.[−26+2T>C] | c.[−26+2T>C] |
| Remes et al., 2002 | 112 | 141 | HMZ | c.[−26+2T>C] | c.[−26+2T>C] |
| Remes et al., 2002 | 113 | 142 | HMZ | c.[−26+2T>C] | c.[−26+2T>C] |
| Remes et al., 2002 | 114 | 143 | HMZ | c.[−26+2T>C] | c.[−26+2T>C] |
| Remes et al., 2002 | 115 | 144 | HMZ | c.[−26+2T>C] | c.[−26+2T>C] |
| Remes et al., 2002 | 116 | 145 | HMZ | c.[−26+2T>C] | c.[−26+2T>C] |
| Remes et al., 2002 | 117 | 146 | HMZ | c.[−26+2T>C] | c.[−26+2T>C] |
| Remes et al., 2002 | 118 | 147 | HMZ | c.[−26+2T>C] | c.[−26+2T>C] |
| Remes et al., 2002 | 119 | 148 | HMZ | c.[−26+2T>C] | c.[−26+2T>C] |
| Remes et al., 2002 | 120 | 149 | HMZ | c.[−26+2T>C] | c.[−26+2T>C] |
| Remes et al., 2002 | 121 | 150 | HMZ | c.[−26+2T>C] | c.[−26+2T>C] |
| Remes et al., 2002 | 122 | 151 | HMZ | c.[−26+2T>C] | c.[−26+2T>C] |
| Remes et al., 2002 | 123 | 152 | HMZ | c.[−26+2T>C] | c.[−26+2T>C] |
| Remes et al., 2002 | 124 | 153 | HMZ | c.[−26+2T>C] | c.[−26+2T>C] |
| Remes et al., 2002 | 125 | 154 | HMZ | c.[−26+2T>C] | c.[−26+2T>C] |
| Remes et al., 2002 | 126 | 155 | HMZ | c.[−26+2T>C] | c.[−26+2T>C] |
| Remes et al., 2002 | 127 | 156 | HMZ | c.[−26+2T>C] | c.[−26+2T>C] |
| Remes et al., 2002 | 128 | 157 | HMZ | c.[−26+2T>C] | c.[−26+2T>C] |
| Remes et al., 2002 | 129 | 158 | HMZ | c.[−26+2T>C] | c.[−26+2T>C] |
| Remes et al., 2002 | 130 | 159 | HTZ | c.[−26+2T>C] | unknown |
| Remes et al., 2002 |  | 160 | HTZ | c.[−26+2T>C] | unknown |
| Remes et al., 2002 | 131 | 161 | HTZ | c.[−26+2T>C] | unknown |
| Remes et al., 2002 | 132 | 162 | HTZ | c.[−26+2T>C] | unknown |
| Remes et al., 2002 | 133 | 163 | cHTZ | c.[−26+2T>C] | p.[R279W] |
| Remes et al., 2002 |  | 164 | cHTZ | c.[−26+2T>C] | p.[R279W] |
| Remes et al., 2002 | 134 | 165 | cHTZ | c.[−26+2T>C] | p.[R279W] |
| Remes et al., 2002 |  | 166 | cHTZ | c.[−26+2T>C] | p.[R279W] |
| Remes et al., 2002 | 135 | 167 | cHTZ | c.[−26+2T>C] | p.[R279W] |
| Remes et al., 2002 | 136 | 168 | cHTZ | c.[−26+2T>C] | p.[R279W] |
| Remes et al., 2002 | 137 | 169 | cHTZ | c.[−26+2T>C] | p.[R279W] |
| Remes et al., 2002 | 138 | 170 | cHTZ | c.[−26+2T>C] | p.[R279W] |
| Remes et al., 2002 | 139 | 171 | cHTZ | c.[−26+2T>C] | p.[R279W] |
| Bonafé et al., 2008 | 140 | 172 | cHTZ | c.[−26+2T>C] | p.[T512K] |
| Bonafé et al., 2008 | 141 | 173 | cHTZ | c.[−26+2T>C] | p.[T512K] |
| Bonafé et al., 2008 | 142 | 174 | cHTZ | c.[−26+2T>C] | p.[T512K] |
| Bonafé et al., 2008 | 143 | 175 | cHTZ | c.[−26+2T>C] | p.[T512K] |
| Bonafé et al., 2008 | 144 | 176 | cHTZ | c.[−26+2T>C] | p.[T512K] |
| Bonafé et al., 2008 | 145 | 177 | cHTZ | c.[−26+2T>C] | p.[T512K] |
| Bonafé et al., 2008 | 146 | 178 | cHTZ | c.[−26+2T>C] | p.[T512K] |
| Makitie et al., 2015 | 147 | 179 | HMZ | c.[−26+2T>C] | c.[−26+2T>C] |
| Total | 147 | 179 |  |  |  |

1. **Allelic Frequency Non-finnish DTD**

| **Variant c.** | **Variant p.** | **NO of alleles** | **%** | **Protein domain** |
| --- | --- | --- | --- | --- |
| c.862C>T | p.R279W | 137 | 50.2 | EC-loop |
| c.1984T>A | p.C653S | 22 | 8.1 | STAS |
| c.−26+2T>C | p? | 17 | 6.2 | - |
| c.559C>T | p.R178* | 16 | 5.9 | EC-loop |
| c.1751del | p.K575Sfs*10 | 8 | 2.9 | STAS |
| c.1045_1047del | p.V340del | 8 | 2.9 | TD 7 |
| c.1987G>A | p.G663R | 7 | 2.6 | STAS |
| c.1535C>A | p.T512K | 7 | 2.6 | TD 13 |
| c.2171C>T | p.A715V | 5 | 1.8 | STAS |
| c.727-1G>C | p? | 4 | 1.5 | - |
| c.1824A>C | p.L599F | 4 | 1.5 | STAS |
| c.1300A>G | p.N425D | 4 | 1.5 | TD 9 |
| c.1153G>A | p.D385N | 2 | 0.7 | TD 8 |
| c.422T>C | p.L132P | 2 | 0.7 | TD 1 |
| c.851T>C | p.L275P | 2 | 0.7 | EC-loop |
| c.1225C>T | p.L400F | 2 | 0.7 | TD 8 |
| c.1475T>C | p.L483P | 2 | 0.7 | TD 12 |
| c.2147_2148ins | p.L707Pfs*4 | 2 | 0.7 | STAS |
| c.1388A>C | p.Q454P | 2 | 0.7 | TD 11 |
| c.485_486del | p.V162Gfs*12 | 2 | 0.7 | Cito-loop |
| c.425C>T | p.A133V | 1 | 0.4 | TD 1 |
| c.2010del | p.A662Qfs*6 | 1 | 0.4 | STAS |
| c.2182del | p.A719Qfs*16 | 1 | 0.4 | STAS |
| c.794T>C | p.F256S | 1 | 0.4 | TD 5 |
| c.371G>C | p.G115A | 1 | 0.4 | TD 1 |
| c.737G>T | p.G237V | 1 | 0.4 | Cito-loop |
| c.791G>A | p.G255E | 1 | 0.4 | TD 5 |
| c.803G>T | p.G259V | 1 | 0.4 | TD 5 |
| c.2060G>T | p.G678V | 1 | 0.4 | STAS |
| c.418del | p.L131Cfs*41 | 1 | 0.4 | TD 1 |
| c.236A>C | p.N77H | 1 | 0.4 | N-terminal |
| c.172del | p.R49Dfs*40 | 1 | 0.4 | N-terminal |
| c.496T>A | p.S157T | 1 | 0.4 | Cito-loop |
| c.1221del | p.S399Hfs*61 | 1 | 0.4 | TD 8 |
| c.1565C>T | p.S522F | 1 | 0.4 | TD 13 |
| c.797C>T | p.T266I | 1 | 0.4 | TD 5 |
| c.1905del | p.T627Lfs*23 | 1 | 0.4 | STAS |
| c.476del | p.Y151Ifs*21 | 1 | 0.4 | TD 2 |
| unknown | unknown | 9 |  |  |
|  |  | 273 |  |  |
|  |  |  |  |  |
| TD: Transmembrane domains | |  |  |  |
| EC-loop:Extracellular loop | |  |  |  |
| Cito-loop:Citosolic loop | |  |  |  |
| EC-DB: Possible extracellular loop disulfide bridge | | |  |  |
| Sulfate Transporter and Anti-Sigma: STAS domain | | |  |  |
|  |  |  |  |  |

1. **Frequent genotypes**

| **Variant** | **Alleles** | **Number of patients** | **Genotypes** | **Number of patients with the genotype** |
| --- | --- | --- | --- | --- |
| p.[R279W] | 137 | 91 | **p.[R279W];[R279W]** | **46/91 (46 rMED)** |
| p.[R279W];[R178*] | 12/91 (10 DTD and 2 AO-2) |
| p.[R279W];c.[−26+2T>C] | 10/91 (6 rMED and 4 DTD) |
| p.[R279W];[T512K] | 3/91 (rMED) |
| p.[R279W];[K575Sfs*10] | 3/91 (2 DTD and 1 AO-2) |
| p.[R279W];c.[727-1G>C] | 3/91 (DTD) |
| p.[R279W];[N425D] | 2/91 (1 AO-2 and 1 DTD) |
| p.[R279W];[N77H] | 1/91 (rMED) |
| p.[R279W];[G115A] | 1/91 (DTD) |
| p.[R279W];[L131Cfs*41] | 1/91 ( AO-2) |
| p.[R279W];[S157T] | 1/91 (DTD) |
| p.[R279W];.[G237V] | 1/91 (rMED) |
| p.[R279W];[S522F] | 1/91 (rMED) |
| p.[R279W];[T627Lfs*23] | 1/91 ( AO-2) |
| p.[R279W];[G663R] | 1/91 (DTD) |
| p.[R279W];[L707Pfs*4] | 1/91 (DTD) |
| p.[R279W];[A719Qfs*16] | 1/91 (rMED/DBQD) |
| p.[R279W];[wt] | 2/91 (1 DTD and 1 AO-2) |
| p.[C653S] | 22 | 15 | **p.[C653S];[C653S]** | **7/15 (rMED)** |
| p.[C653S];[A715V] | 4/15 (3 DTD and 1 rMED) |
| p.[C653S];c.[−26+2T>C] | 3/15 (rMED) |
| p.[C653S];[L707Pfs*4] | 1/15 (DTD) |
| c.[−26+2T>C] | 17 | 17 | c.[−26+2T>C];p.[R279W] | 10/17 (6rMED and 4 DTD) |
| c.[−26+2T>C];p.[C653S] | 3/17 (rMED) |
| c.[−26+2T>C];p.[G259V] | 1/17 (ACG-1B) |
| c.[−26+2T>C];p.[N425D] | 1/17 (ACG-1B) |
| c.[−26+2T>C];p.[R49Dfs*40] | 1/17 (AO-2) |
| c.[−26+2T>C];p.[F256S] | 1/17 (rMED) |
| p.[R178*] | 16 | 16 | p.[R178*];[R279W] | 12/16 (10 DTD and 2 AO-2) |
| p.[R178*];[G678V] | 1/16 (ACG-1B) |
| p.[R178*];[S399Hfs*61] | 1/16 (ACG-1B) |
| p.[R178*];[Y151Ifs*21] | 1/16 (ACG-1B) |
| p.[R178*];[A133V] | 1/16 (DTD/DBQD) |
| p.[K575Sfs*10] | 8 | 8 | p.[K575Sfs*10];[unknown] | 3/8 (DTD) |
| p.[K575Sfs*10];[R279W] | 2/8 (DTD) |
| p.[K575Sfs*10];[R279W] | 1/8 (AO-2) |
| p.[K575Sfs*10];[N425D] | 1/8 (ACG-1B) |
| p.[K575Sfs*10];[unknown] | 1/8 (AO-2) |
| p.[V340del] | 8 | 5 | **p.[V340del];[V340del]** | **3/5 (ACG-1B)** |
| p.[V340del];[unknown] | 1/5 (ACG-1B) |
| p.[T266I];[V340del] | 1/5 (DTD/rMED/DBQD) |
| p.[G663R] | 7 | 4 | **p.[G663R];[G663R]** | **3/4 (ACG-1B)** |
| p.[G663R];[R279W] | 1/4 (DTD) |
| p.[T512K] | 7 | 5 | p.[R279W];[T512K] | 3/5 (rMED) |
| **p.[T512K];[T512K]** | **2/5 (AO-2)** |
|  |  |  |  |  |

1. **Variants related known genotype**

| **Variant** | **Phenotype** |
| --- | --- |
| p.[R49Dfs*40] | AO-2 |
| p.[N77H] | rMED |
| p.[L131Cfs*41] | AO-2 |
| p.[Y151Ifs*21] | ACG-1B |
| p.[S399Hfs*61] | ACG-1B |
| p.[V340del] | ACG-1B, DTD/rMED/DBQD |
| p.[G115A] | DTD |
| p.[S157T] | DD |
| p.[V162Gfs*12] | rMED |
| p.[R178*] | ACG-1B, AO-2, DTD, DTD/DBQD |
| p.[G237V] | rMED |
| p.[L132P] | ACG-1B |
| p.[A133V] | DTD/DBQD |
| p.[G255E] | AO-2 |
| p.[F256S] | rMED |
| p.[L275P] | rMED |
| p.[R279W] | AO-2, DTD, rMED, rMED/DBQD |
| p.[G259V] | ACG-1B |
| p.[T266I] | DTD/rMED/DBQD |
| p.[D385N] | rMED |
| p.[L400F] | rMED |
| p.[N425D] | ACG-1B, AO-2, DTD |
| p.[Q454P] | DTD |
| p.[L483P] | ACG-1B |
| p.[T512K] | AO-2, rMED |
| p.[S522F] | rMED |
| p.[K575Sfs*10] | ACG-1B, AO-2, DTD |
| p.[T627Lfs*23] | AO-2 |
| p.[A662Glnfs*6] | DTD |
| p.[L707Pfs*4] | DTD |
| p.[A719Qfs*16] | rMED/DBQD |
| p.[L599F] | AO-2 |
| p.[C653S] | DTD, rMED |
| p.[G663R] | ACG-1B, DTD |
| p.[G678V] | ACG-1B |
| p.[A715V] | AO-2, DTD, rMED |
| c.[−26+2T>C] | AO-2, ACG-1B, DTD, rMED |
| c.[727-1G>C] | DTD |
|  |  |

1. **Functional Studies**

| **Variant** | **Sulfate transport** | **Residual sultafe transport capacity** | **Reference** |
| --- | --- | --- | --- |
| p.[R178*] | <10% | null variant | Karniski 2001; Karniski 2004 |
| p.[G255E] | <10% | null variant | Karniski 2001 |
| p.[R279W] | 32% (Xenopus laevis oocytes) and ~50% (HEK-293 cells) | intermediate/partial funcion variant | Karniski 2001; Karniski 2004 |
| p.[V340del] | 17% | null variant | Karniski 2001; Karniski 2004 |
| p.[N425D] | <10% | null variant | Karniski 2001; Karniski 2004 |
| p.[Q454P] | ~39% | partial funcion variant | Karniski 2001; Karniski 2004 |
| p.[L483P] | <10% | null variant | Karniski 2001; Karniski 2004 |
| p.[K575Sfs*10] | <10% | null variant | Karniski 2001; Karniski 2004 |
| p.[G663R] | transporter trapped within the cytoplasm | null variant | Maeda et al.,2006 |
| p.[C653S] | 100% (Xenopus laevis oocytes); ~50% (HEK-293 cells) | near-normal activity/partial function variant | Karniski 2001; Karniski 2004 |
| p.[G678V] | >50% (Xenopus laevis oocytes) and ~20% (HEK-293 cells) | near-normal activity/null function variant | Karniski 2001; Karniski 2004 |
| p.[A715V] | ~60% | near-normal activity | Karniski 2001; Karniski 2004 |

1. **Other variants**

| **Variant** | **AA** | **Variant Type** | **Reference** | **Observation** |
| --- | --- | --- | --- | --- |
| p.S16* | 16 | Nonsense | Rossi et al., 2001 |  |
| p.G19* | 19 | Nonsense | Rossi et al., 2001 |  |
| p.N87Ifs*2 | 87 | Frameshift | Rossi et al., 2001 |  |
| p.W98R | 98 | Missense | Yang et al., 2019 | only US image available |
| p.D111Y | 111 | Missense | Rossi et al., 2001 |  |
| p.Q135K | 135 | Missense | Rossi et al., 2001 |  |
| p.Val162Leu | 162 | Missense | Li et al., 2020 | Article in Chinese |
| p.G166R | 166 | Missense | Rossi et al., 2001 |  |
| p.M236Sfs*16 | 236 | Frameshift | Rossi et al., 2001 |  |
| p.C303* | 303 | Nonsense | Rossi et al., 2001 |  |
| p.A386V | 386 | Missense | Rossi et al., 2001 |  |
| p.N415Rfs*44 | 415 | Frameshift | Rossi et al., 2001 |  |
| p.L465Cfs*5 | 465 | Frameshift | Rossi et al., 2001 |  |
| p.Ser481Lysfs*17 | 481 | Frameshift | Li et al., 2020 | Article in Chinese |
| p.G484D | 484 | Missense | Rossi et al., 2001 |  |
| p.S551Vfs*34 | 551 | Frameshift | Rossi et al., 2001 |  |
| p.L659* | 659 | Nonsense | Rossi et al., 2001 |  |
| p.H665P | 665 | Missense | Rossi et al., 2001 |  |
|  |  |  |  |  |
| p.R492W | 492 | Missense | Rossi et al., 2001 and Bonafe et al., 2008 | Polymorphism |
| p.T574I | 574 | Missense | Rossi et al., 2001 and others | Polymorphism |
| p.T689S | 689 | Missense | Cai et al., 1998 and others | Polymorphism |

1. **Genotypes_Domain**

| **Phenotype** | **Zygosity** | **Allele 1** | **Variant Type** | **Protein Domain** | **Allele 2** | **Variant Type** | **Protein Domain** |
| --- | --- | --- | --- | --- | --- | --- | --- |
| ACG-1B | cHTZ | c.[−26+2T>C] | 5' splice donor of intron 1 | - | p.[G259V] | Missense | TD5 - midle |
| ACG-1B | cHTZ | c.[−26+2T>C] | 5' splice donor of intron 1 | - | p.[N425D] | Missense | TD9 - midle |
| DTD | HTZ | c.[727-1G>C] | Splice site | - | unknown | - | - |
| AO-2 | cHTZ | p.[R49Dfs*40] | Frameshift | N-terminal | c.[−26+2T>C] | 5' splice donor of intron 1 | - |
| rMED | cHTZ | p.[V162Gfs*12] | Frameshift | Cito-loop | p.[D385N] | Missense | TD8 - border |
| rMED | cHTZ | p.[C653S] | Missense | STAS | c.[−26+2T>C] | 5' splice donor of intron 1 | - |
| rMED, DTD | cHTZ | p.[C653S] | Missense | STAS | p.[A715V] | Missense | STAS |
| AO-2, DTD | HTZ | p.[K575Sfs*10] | Frameshift | STAS | unknown | - | - |
| AO-2 | cHTZ | p.[R279W] | Missense | EC-loop | p.[L131Cfs*41] | Frameshift | TD1 - border |
| AO-2 | cHTZ | p.[R279W] | Missense | EC-loop | p.[T627Lfs*23] | Frameshift | STAS |
| DTD, rMED | cHTZ | p.[R279W] | Missense | EC-loop | c.[−26+2T>C] | 5' splice donor of intron 1 | - |
| DTD | cHTZ | p.[R279W] | Missense | EC-loop | c.[727-1G>C] | Splice site | - |
| rMED/DBQD | cHTZ | p.[R279W] | Missense | EC-loop | p.[A719Qfs*16] | Frameshift | STAS |
| DTD | cHTZ | p.[R279W] | Missense | EC-loop | c.[727-1G>C] | Splice site | - |
| DTD | cHTZ | p.[R279W] | Missense | EC-loop | p.[G115A] | Missense | TD1 - midle |
| DTD | cHTZ | p.[R279W] | Missense | EC-loop | p.[G663R] | Missense | STAS |
| AO-2, DTD | cHTZ | p.[R279W] | Missense | EC-loop | p.[K575Sfs*10] | Frameshift | STAS |
| DTD | cHTZ | p.[R279W] | Missense | EC-loop | p.[L707Pfs*4] | Frameshift | STAS |
| rMED | cHTZ | p.[F256S] | Missense | TD5 - midle | c.[−26+2T>C] | 5' splice donor of intron 1 | - |
| rMED | HMZ | p.[R279W] | Missense | EC-loop | p.[R279W] | Missense | EC-loop |
| rMED | cHTZ | p.[L275P] | Missense | EC-loop | p.[L400F] | Missense | TD8 - border |
| rMED | cHTZ | p.[R279W] | Missense | EC-loop | p.[G237V] | Missense | Cito-loop |
| rMED | cHTZ | p.[R279W] | Missense | EC-loop | p.[N77H] | Missense | N-terminal |
| rMED | cHTZ | p.[R279W] | Missense | EC-loop | p.[S522F] | Missense | TD13 - border |
| rMED | cHTZ | p.[R279W] | Missense | EC-loop | p.[T512K] | Missense | TD13 - border |
| AO-2, DTD | cHTZ | p.[R279W] | Missense | EC-loop | p.[N425D] | Missense | TD9 - midle |
| DTD | cHTZ | p.[C653S] | Missense | STAS | p.[L707Pfs*4] | Frameshift | STAS |
| rMED | HMZ | p.[C653S] | Missense | STAS | p.[C653S] | Missense | STAS |
| ACG-1B | HMZ | p.[G663R] | Missense | STAS | p.[G663R] | Missense | STAS |
| AO-2, DTD | cHTZ | p.[R279W] | Missense | EC-loop | p.[R178*] | Nonsense | EC-loop |
| DTD | cHTZ | p.[R279W] | Missense | EC-loop | p.[S157T] | Missense | Cito-loop |
| AO-2, DTD | HTZ | p.[R279W] | Missense | EC-loop | unknown | - | - |
| DTD | HTZ | p.[A662Glnfs*6] | Frameshift | STAS | unknown | - | - |
| AO-2 | cHTZ | p.[G255E] | Missense | TD 5 - border | p.[A715V] | Missense | STAS |
| DTD/DBQD | cHTZ | p.[A133V] | Missense | TD1 - border | p.[R178*] | Nonsense | EC-loop |
| AO-2 | HMZ | p.[L599F] | Missense | STAS | p.[L599F] | Missense | STAS |
| DTD | HMZ | p.[Q454P] | Missense | TD 11 Core- N-terminal | p.[Q454P] | Missense | TD 11- N-terminal |
| DTD/rMED/DBQD | cHTZ | p.[T266I] | Missense | TD5 - midle | p.[V340del] | in frame del | TD7 - midle |
| ACG-1B | HMZ | p.[L132P] | Missense | TD1 Core - border | p.[L132P] | Missense | TD1 - border |
| ACG-1B | cHTZ | p.[N425D] | Missense | TD9 - midle | p.[K575Sfs*10] | Frameshift | STAS |
| ACG-1B | HMZ | p.[L483P] | Missense | TD12 Gate - border | p.[L483P] | Missense | TD12 - border |
| AO-2 | HMZ | p.[T512K] | Missense | TD13 Gate - border | p.[T512K] | Missense | TD13 - border |
| ACG-1B | cHTZ | p.[R178*] | Nonsense | EC-loop | p.[G678V] | Missense | STAS |
| ACG-1B | cHTZ | p.[R178*] | Nonsense | EC-loop | p.[S399Hfs*61] | Frameshift | TD8- midle |
| ACG-1B | HMZ | p.[V340del] | in frame del | TD7 Gate- midle | p.[V340del] | in frame del | TD7 - midle |
| ACG-1B | HTZ | p.[V340del] | in frame del | TD7 - midle | unknown | - | - |
| ACG-1B | cHTZ | p.[R178*] | Nonsense | EC-loop | p.[Y151Ifs*21] | Frameshift | TD2-border |
|  |  |  |  |  |  |  |  |

1. **Genotype_Domains_summary**

|  |  | **VARIANT 2** | | | | | | | | | |
| --- | --- | --- | --- | --- | --- | --- | --- | --- | --- | --- | --- |
|  |  | **Missense** | | | **Nonsense** | **Frameshift** | | | **In frame del** | **Splice / 5' UTR** | **Unknown** |
| **VARIANT 1** | | **EC-loop/ Cito-loop/ N-terminal** | **STAS** | **TD** | **EC-loop/ Cito-loop** | **EC-loop/ Cito-loop** | **STAS** | **TD** | **TD** |  |
| **Missense** | **EC-loop/ Cito-loop / N-terminal** | DTD rMED | DTD | AO-2 DTD rMED | AO-2 DTD |  | AO-2 DTD rMED/DBQD | AO-2 |  | DTD rMED | AO-2 DTD |
| **STAS** |  | ACG-1B AO-2 DTD rMED |  |  |  | DTD |  |  | rMED |  |
| **TD** |  | AO-2 | ACG-1B AO-2 DTD | DTD/DBQD | rMED | ACG-1B |  | DTD/rMED/DBQD | ACG-1B rMED |  |
| **Nonsene** | **EC-loop/ Cito-loop** |  | ACG-1B |  |  |  |  | ACG-1B |  |  |  |
| **Frameshift** | **STAS** |  |  |  |  |  |  |  |  |  | AO-2 DTD |
| **N-terminal** |  |  |  |  |  |  |  |  | AO-2 |  |
| **In frame del** | **TD** |  |  |  |  |  |  |  | ACG-1B |  | ACG-1B |
| **Splice / 5'UTR** | |  | rMED |  |  |  |  |  |  |  | DTD |

1. **Protein Domains**

| **Domain** | **AA range** |
| --- | --- |
| Cito-loop | 154-166 |
| Cito-loop | 236-241 |
| Cito-loop | 247-250 |
| Cito-loop | 329-335 |
| Cito-loop | 407-414 |
| Cito-loop | 449-454 |
| Cito-loop | 492-494 |
| Cito-loop | 498-509 |
| Cito-loop | 546-550 |
| C-terminal | 721-739 |
| EC-loop | 133-137 |
| EC-loop | 176-221 |
| EC-loop | 272-302 |
| EC-loop | 350-380 |
| EC-loop | 431-440 |
| EC-loop | 477-480 |
| EC-loop | 524-527 |
| N-glycosylation cryptic site extracellular loop 4 | 357-357 |
| N-glycosylation site at extracellular loop | 199-199 |
| N-glycosylation site at extracellular loop | 205-205 |
| N-terminal | 1-105 |
| EC-DB | 212-216 |
| STAS | 551-720 |
| TD | 106-133 |
| TD | 137-154 |
| TD | 166-176 |
| TD | 221-236 |
| TD | 250-272 |
| TD | 302-329 |
| TD | 335-350 |
| TD | 380-407 |
| TD | 414-431 |
| TD | 440-449 |
| TD | 454-477 |
| TD | 480-492 |
| TD | 509-524 |
| TD | 527-546 |
|  |  |
|  |  |
| TD: Transmembrane domains |  |
| EC-loop:Extracellular loop |  |
| Cito-loop:Citosolic loop |  |
| EC-DB: Possible extracellular loop disulfide bridge |  |
| Sulfate Transporter and Anti-Sigma: STAS domain |  |

1. **Patients_families summary**

| **Phenotype** | **Patients** | **Families** | **Family´s zygosity** | | |
| --- | --- | --- | --- | --- | --- |
| **HMZ** | **cHTZ** | **HTZ** |
| **DTD total** | 214 | 177 | 117 | 37 | 23 |
| DTD Finnish | 179 | 147 | 115 | 15 | 17 |
| DTD non-Finnish | 35 | 29 | 1 | 22 | 6 |
| **rMED** | 74 | 61 | 42 | 19 | 0 |
| **ACG-1B** | 15 | 14 | 7 | 6 | 1 |
| **AO-2** | 14 | 12 | 3 | 7 | 2 |
| **DTD/rMED/DBQD** | 1 | 1 | 0 | 1 | 0 |
| **DTD/DBQD** | 1 | 1 | 0 | 1 | 0 |
| **rMED/DBQD** | 1 | 1 | 0 | 1 | 0 |

**References used in the review**

Barreda-Bonis, AC, Barraza-García J, Parrón M, Pastro I, Heath KE, González-Casado I. Multiple SLC26A2 mutations occurring in a three-generational family. Eur J Med Genet 2018; 61:24-28. [https://doi.org/10.1016/j.ejmg.2017.10.007](https://doi.org/10.1016/j.ejmg.2017.10.007" \t "_blank" \o "Persistent link using digital object identifier)

Ballhausen D, Bonafé L, Terhal P, Unger SL, Bellus G, Classen M, et al. Recessive multiple epiphyseal dysplasia (rMED): phenotype delineation in eighteen homozygotes for DTDST mutation R279W. J Med Genet. 2003;40(1):65-71. https://doi.org/10.1136/jmg.40.1.65

Barbosa M, Sousa AB, Medeira A, Lourenço T, Saraiva J, Pinto-Basto J, et al. Clinical and molecular characterization of Diastrophic Dysplasia in the Portuguese population. Clin Genet. 2011;80(6):550-7. https://doi.org/10.1111/j.1399-0004.2010.01595.x

Bonafé L, Hästbacka J, de la Chapelle A, Campos-Xavier AB, Chiesa C, Superti-Furga A, et al. A novel mutation in the sulfate transporter gene SLC26A2 (DTDST) specific to the Finnish population causes de la Chapelle dysplasia. J Med Genet 2008;45(12):827–1. https://doi.org/10.1136/jmg.2007.057158

Cai G, Nakayama M, Hiraki Y, Ozono K. Mutational analysis of the DTDST gene in a fetus with achondrogenesis type 1B. Am J Med Genet 1998;78(1):58–60.

Cho TJ, Kim Ok-H, Lee HR, Shin SJ, Yoo WJ, Park WY, et al. Autosomal Recessive Multiple Epiphyseal Dysplasia in a Korean Girl Caused by Novel Compound Heterozygous Mutations in the DTDST (SLC26A2) Gene. Korean Med Sci 2010;25(7):1105-8. https://doi.org/10.3346/jkms.2010.25.7.1105

Czarny-Ratajczak M, Lohiniva J, Rogala P, Kozlowski K, Perälä M, Carter L, et al. A mutation in COL9A1 causes multiple epiphyseal dysplasia: further evidence for locus heterogeneity. Am J Hum Genet A 2001;69(5):969–80. https://doi.org/10.1086/324023

Czarny-Ratajczak M, Bieganski T, Rogala P, Glowacki M, Trzeciak T, Kozlowski K. New intermediate phenotype between MED and DD caused by compound heterozygous mutations in the DTDST gene. Am J Med Genet A 2010;152A(12):3036-42. https://doi.org/10.1002/ajmg.a.33707

Dwyer E, Hyland J, Modaff P, Pauli RM. Genotype-phenotype correlation in DTDST dysplasias: Atelosteogenesis type II and diastrophic dysplasia variant in one family. Am J Med Genet A 2010;152A(12):3043-50. https://doi.org/10.1002/ajmg.a.33736

Hastbacka J, de la Chapelle A, Mahtani MM, Clines G, Reeve-Daly MP, Daly M, et al. The diastrophic dysplasia gene encodes a novel sulfate transporter: positional cloning by fine-structure linkage disequilibrium mapping. Cell 1994;78(6):1073–87. https://doi.org/10.1016/0092-8674(94)90281-x

Hästbacka J, Superti-Furga A, Wilcox WR, Rimoin DL, Cohn DH, et al. Atelosteogenesis type II is caused by mutations in the diastrophic dysplasia sulfate-transporter gene (DTDST): evidence for a phenotypic series involving three chondrodysplasias. Am J Hum Genet 1996;58(2):255-62.

Hastbacka J, Kerrebrock A, Mokkala K, Clines G, Lovett M, Kaitila I, et al. Identification of the Finnish founder mutation for diastrophic dysplasia (DTD). European Journal of Human Genetics 1999;7(6):664–70. https://doi.org/10.1038/sj.ejhg.5200361

Hinrichs T, Superti-Furga A, Scheiderer WD, Bonafé L, Brenner RE. Recessive multiple epiphyseal dysplasia (rMED) with homozygosity for C653S mutation in the DTDST gene - Phenotype, molecular diagnosis and surgical treatment of habitual dislocation of multilayered patella: Case report. BMC Musculoskeletal Disorders 2010;3(11):110. https://doi.org/10.1186/1471-2474-11-110

Honório JC, Bruns RF, Gründtner LF, Raskin S, Ferrari LP, Araujo Júnior E, et al. Diastrophic dysplasia: prenatal diagnosis and review of the literature. Sao Paulo Med J 2013;131(2):127-32. https://doi.org/10.1590/S1516-31802013000100024

Jackson GC, Mittaz-Crettol L, Taylor JA, Mortier GR, Spranger J. Pseudoachondroplasia and multiple epiphyseal dysplasia: a 7-year comprehensive analysis of the known disease genes identify novel and recurrent mutations and provides an accurate assessment of their relative contribution. Hum Mutat 2011;33(1):144-57. https://doi.org/10.1002/humu.21611

Jakkula E, Mäkitie O, Czarny-Ratajczak M, Jackson GC, Damignani R, Briggs MD, et al. Mutations in the known genes are not the major cause of MED; distinctive phenotypic entities among patients with no identified mutations. Eur J Hum Genet 2005;13(3):292–301. https://doi.org/10.1038/sj.ejhg.5201314

Kausar M, Mäkitie RE, Toiviainen-Salo S, Ignatius J, Anees M, Mäkitie O. Recessive Multiple Epiphyseal Dysplasia - clinical characteristics caused by rare compound heterozygous SLC26A2 genotypes. Eur J Med Genet. 2019;62(11):103573. https://doi.org/10.1016/j.ejmg.2018.11.007

Kim OH, Park H, Seong MW, Cho TJ, Nishimura G, Superti-Furga A, et al. Revisit of multiple epiphyseal dysplasia: ethnic difference in genotypes and comparison of radiographic features linked to the COMP and MATN3 genes. Am J Med Genet A 2011;155A(11):2669–80. https://doi.org/10.1002/ajmg.a.34246

Macías-Gómez NM, Mégarbané A, Leal-Ugarte E, Rodríguez-Rojas LX, Barros-Núñez P. Diastrophic dysplasia and atelosteogenesis type II as expression of compound heterozygosis: first report of a Mexican patient and genotype-phenotype correlation. Am J Med Genet A 2004;129A(2):190-2. https://doi.org/10.1002/ajmg.a.30149

Maeda K, Miyamoto Y, Sawaki H, Karniski LP, Nakashima E, Nishimura G, et al. A compound heterozygote harboring novel and recurrent DTDST mutations with intermediate phenotype between atelosteogenesis type II and diastrophic dysplasia. Am J Med Genet A 2006;140(11):1143–7. https://doi.org/10.1002/ajmg.a.31225

Mäkitie O, Savarirayan R, Bonafe L, Robertson S, Susic M, Superti-Furga A, et al. Autosomal recessive multiple epiphyseal dysplasia with homozygosity for C653S in the DTDST gene: Double-Layer Patella as a Reliable Sign. Am J Med Genet 122A 2003(3):187–92. https://doi.org/10.1002/ajmg.a.20282

Mäkitie O, Geiberger S, Horemuzova E, Hagenäs L, Moström E, Nordenskjöld M, et al. SLC26A2 disease spectrum in Sweden – high frequency of recessive multiple epiphyseal dysplasia (rMED). Clin Genet 2015;87(3):273–8. https://doi.org/10.1111/cge.12371

Martínez García M, Velez C, Fenollar-Cortés M, Bustamante A, Lorda-Sanchez I, Soriano-Guillén L, et al. Paternal isodisomy of chromosome 5 in a Patient with Recessive multiple Epiphyseal dysplasia. Am J Med Genet A 2014;164A(4):1075-8. https://doi.org/10.1002/ajmg.a.36378

Mattos EP, Magalhães JAA, Mittaz-Crettol L, Azambuja R, Okada L, Cavalcanti DP, et al. Atelosteogenesis Type 2/Diastrophic dysplasia phenotypic spectrum: from prenatal to preimplantation genetic diagnosis. Open Journal of Obstetrics and Gynecology 2014;(4):399-404.

Mégarbané A, Haddad FA, Haddad-Zebouni S, Achram M, Eich G, Le Merrer M, et al. Homozygosity for a novel DTDST mutation in a child with a 'broad bone-platyspondylic' variant of diastrophic dysplasia. Clin Genet 1999;56(1):71-6. https://doi.org/10.1034/j.1399-0004.1999.560110.x

Miller E, Blaser S, Miller S, Keating S, Thompson M, Unger S, et al. Fetal MR imaging of atelosteogenesis type II (AO-II). Pediatr Radiol 2008;38(12):1345–9. https://doi.org/10.1007/s00247-008-0974-y

Miyake A, Nishimura G, Futami T, Ohashi H, Chiba K, Toyama Y, et al. A compound heterozygote of novel and recurrent DTDST mutations results in a novel intermediate phenotype of Desbuquois dysplasia, diastrophic dysplasia, and recessive form of multiple epiphyseal dysplasia. J Hum Genet 2008;53(8):764–8. https://doi.org/10.1007/s10038-008-0305-z

Panzer KM, Lachman R, Modaff P, Pauli RM. A phenotype intermediate between Desbuquois dysplasia and diastrophic dysplasia secondary to mutations in DTDST. Am J Med Genet Part A 2008;146A:(22):2920–4. https://doi.org/10.1002/ajmg.a.32543

Pineda T, Rossi A, Bonafè L, Superti-Furga A, Velasco HM. Report of a novel mutation in the SLC26A2 gene found in a Colombian adult patient with diastrophic dysplasia. Rev Fac Med 2013;61(3):255-9. Available from: http://www.scielo.org.co/scielo.php?script=sci_arttext&pid=S0120-00112013000300005&lng=en.

Ramírez-Castro JL, Rada AMC, Henao BEM, Gaviria GCR, Palacio GV, Quiroz AEP. Displasia diastrófica: Caracterización clínica, radiológica, citogenética y molecular de una paciente. Iatreia 2005;1(18):40-8. Available from: http://www.scielo.org.co/scielo.php?script=sci_arttext&pid=S0121-07932005000100003&lng=en.

Remes VM, Hästbacka JR, Poussa MS, Peltonen JI. Does genotype predict development of the spinal deformity in patients with diastrophic dysplasia? Eur Spine J 2002;11(4):327-31 https://doi.org/10.1007/s00586-002-0413-y

Rossi A, Bonaventure J, Delezoide AL, Cetta G, Superti-Furga A. Undersulfation of proteoglycans synthesized by chondrocytes from a patient with achondrogenesis type 1B homozygous for an L483P substitution in the diastrophic dysplasia sulfate transporter. J Biol Chem 1996a;271(31):18456–64. https://doi.org/10.1074/jbc.271.31.18456

Rossi A, van der Harten HJ, Beemer FA, Kleijer WJ, Gitzelmann R, Steinmann B, et al. Phenotypic and genotypic overlap between atelosteogenesis type 2 and diastrophic dysplasia. Hum Genet, 1996b;98(6):657-61. https://doi.org/10.1007/s00439005027

Rossi A, Bonaventure J, Delezoide AL, Superti-Furga A, Cetta G. Undersulfation of cartilage proteoglycans ex vivo and increased contribution of amino acid sulfur to sulfation in vitro in McAlister dysplasia/atelosteogenesis type 2. Eur J Biochem 1997;248(3):741–7. https://doi.org/10.1111/j.1432-1033.1997.t01-1-00741.x

Sato T, Kojima T, Samura O, Kawaguchi S, Nakamura A, Nakajima M,et al. Two unrelated pedigrees with achondrogenesis type 1b carrying a Japan-specific pathogenic variant in SLC26A2. Am J Med Genet A 2020;182(4):735-9. https://doi.org/10.1002/ajmg.a.61469

Superti-Furga A, Hastbacka J, Wilcox WR, Cohn DH, van der Harten HJ, Rossi A, et al. Achondrogenesis type IB is caused by mutations in the diastrophic dysplasia sulphate transporter gene. Nat Genet 1996;12(1):100–2. https://doi.org/10.1038/ng0196-100

Superti-Furga A, Neumann L, Riebel T, Eich G, Steinmann B, Spranger J, et al. Recessively inherited multiple epiphyseal dysplasia with normal stature, club foot, and double layered patella caused by a DTDST mutation. J Med Genet 1999;36(8):621–4.

Syvänen J, Helenius I, Hero M, Mäkitie O, Ignatius J. Recessive MED with auricular swelling due to compound heterozygosity Arg279Tpr/Thr512Lys in the SLC26A2 gene. Am J Med Genet A 2013;161A(6):1491–4. https://doi.org/10.1002/ajmg.a.35872

Unger S, Le Merrer M, Meinecke P, Chitayat D, Rossi A, Superti-Furga A. A New dysplasia or achondrogenesis type 1B? The importance of histology and molecular biology in delineating skeletal dysplasias. Pediatr Radiol 2001;31(12):893-4. https://doi.org/10.1007/s002470100017

Vikraman SK, Balakrishnan B, Chandra V, Batra M, Kuriakose R, Kannoly G. A case of hereditary novel mutation in SLC26A2 gene (c.1796 A > C) identified in a couple with a fetus affected with atelosteogenesis type 2 phenotype in an antecedent pregnancy. Case Rep Perinat Med 2016;5(1): 65–7. https://doi.org/10.1515/crpm-2014-0059

Zechi-Ceide RM, Moura PP, Raskin S, Richieri-Costa A, Guion-Almeida ML. A compound heterozygote SLC26A2 mutation resulting in robin sequence, mild limbs shortness, accelerated carpal ossification, and multiple epiphysial dysplasia in two Brazilian sisters. A new intermediate phenotype between diastrophic dysplasia and recessive multiple epiphyseal dysplasia. Am J Med Genet A 2013;161A(8):2088-94. https://doi.org/10.1002/ajmg.a.36057

Zhou T, Wang Y, Hang Zhou, Liao Z, Gao B, Su D, et al. Dual novel mutations in SLC26A2 in two siblings with multiple epiphyseal dysplasia 4 from a Chinese family: a case report. BMC Medical Genetics 2018;19(1):70. https://doi.org/10.1186/s12881-018-0596-7
